# Supplementary material for: Sevoflurane Aggravates the Progress of Alzheimer’s Disease Through NLRP3/Caspase-1/Gasdermin D Pathway
Source: Frontiers journal article supplement (doi:10.3389/fcell.2021.801422), 2022-01-19
Supplement: Data_Sheet_1.ZIP [file Data_Sheet_1.ZIP]

## Sheet: Sheet1
Figure 2D
	CCK8	con	sevo	vx765	vx765+sevo		model	model+sevo	model+vx765	model+vx765+sevo			cell percentage	con	sevo	vx765	vx765+sevo		model	model+sevo	model+vx765	model+vx765+sevo
first experiment		0.8195	0.6094	0.8242	0.6198		0.8913	0.7588	0.8303	0.8498			first experiment	88.8539	66.0739	89.3636	67.2016		96.6388	82.2726	90.0249	92.1392
		0.8284	0.6067	0.829	0.6387		0.8622	0.7845	0.7641	0.8201				89.8189	65.7812	89.884	69.2508		93.4837	85.0591	82.8472	88.919
		0.8288	0.5695	0.7854	0.5821		0.9223	0.7897	0.8182	0.7915				89.8623	61.7478	85.1567	63.114		100	85.6229	88.713	85.8181
		0.8248	0.5838	0.8285	0.5964		0.8576	0.7818	0.8036	0.7812				89.4286	63.2983	89.8298	64.6644		92.9849	84.7664	87.13	84.7013
		0.795	0.6098	0.82	0.5634		0.8483	0.7646	0.8131	0.8019				86.1976	66.1173	88.9082	61.0864		91.9766	82.9014	88.16	86.9457
		0.7747	0.6122	0.8273	0.6321		0.8445	0.7654	0.8266	0.8031				83.9965	66.3775	89.6997	68.5352		91.5646	82.9882	89.6238	87.0758
second experiment		0.6717	0.5647	0.5807	0.6142		0.6147	0.4817	0.5702	0.4798			second experiment	100	84.0703	86.4523	91.4396		91.5141	71.7136	84.8891	71.4307
		0.6439	0.4031	0.6104	0.5925		0.5999	0.4779	0.5529	0.5177				95.8612	60.0119	90.8739	88.209		89.3107	71.1478	82.3135	77.0731
		0.6495	0.4998	0.6046	0.5756		0.6043	0.4787	0.5519	0.502				96.695	74.4082	90.0104	85.693		89.9658	71.2669	82.1647	74.7357
		0.6434	0.3866	0.5497	0.5565		0.6018	0.5329	0.4656	0.477				95.7868	57.5555	81.8371	82.8495		89.5936	79.336	69.3167	71.0139
		0.6416	0.5438	0.5963	0.5461		0.6146	0.4456	0.5592	0.5101				95.5188	80.9588	88.7747	81.3012		91.4992	66.3391	83.2515	75.9416
		0.6578	0.2951	0.6072	0.5455		0.6073	0.5148	0.5404	0.4814				97.9306	43.9333	90.3975	81.2118		90.4124	76.6414	80.4526	71.6689
third experiment		0.7609	0.6158	0.7997	0.7068		0.9339	0.6545	0.6983	0.6996			third experiment	82.8506	67.0514	87.0753	76.9599		101.688	71.2652	76.0344	76.176
		0.7999	0.5949	0.7154	0.6724		0.9184	0.6858	0.8031	0.7961				87.0971	64.7757	77.8963	73.2143		100	74.6733	87.4456	86.6834
		0.7374	0.6598	0.5349	0.7643		0.8552	0.7238	0.6183	0.7601				80.2918	71.8423	58.2426	83.2208		93.1185	78.811	67.3236	82.7635
		0.7243	0.6621	0.5728	0.7292		0.8724	0.7333	0.6322	0.7385				78.8654	72.0928	62.3693	79.399		94.9913	79.8454	68.8371	80.4116
		0.7218	0.6827	0.6174	0.7289		0.8303	0.7118	0.7264	0.7564				78.5932	74.3358	67.2256	79.3663		90.4072	77.5044	79.0941	82.3606
		0.7319	0.6859	0.5818	0.7067		0.917	0.7093	0.6451	0.7919				79.6929	74.6842	63.3493	76.949		99.8476	77.2321	70.2417	86.226
fourth experiment		0.3822	0.3356	0.4617	0.5054		0.5695	0.4514	0.5015	0.5019			fourth experiment	62.9343	55.261	76.025	83.2208		93.7757	74.329	82.5786	82.6445
		0.3854	0.3664	0.4465	0.4841		0.6073	0.4939	0.5088	0.5703				63.4612	60.3326	73.5221	79.7135		100	81.3272	83.7807	93.9075
		0.4082	0.3386	0.4453	0.4573		0.5891	0.4762	0.5177	0.5173				67.2155	55.755	73.3246	75.3005		97.0031	78.4126	85.2462	85.1803
		0.4047	0.3595	0.4543	0.4026		0.5966	0.4489	0.5151	0.5162				66.6392	59.1964	74.8065	66.2934		98.2381	73.9173	84.818	84.9992
		0.4162	0.3213	0.4486	0.4205		0.5924	0.4623	0.502	0.5126				68.5329	52.9063	73.8679	69.2409		97.5465	76.1238	82.661	84.4064
		0.424	0.2913	0.4379	0.5291		0.5969	0.3888	0.5249	0.5271				69.8172	47.9664	72.106	87.1233		98.2875	64.0211	86.4317	86.794
	LDH	con	sevo	vx765	vx765+sevo		model	model+sevo	model+vx765	model+vx765+sevo	Max LDH release
first experiment		0.6546	1.1579	0.6752	0.9538		0.752	1.0143	0.7	0.9273	3.337
		0.6746	1.0852	0.6699	0.9883		0.7306	1.0878	0.7943	0.9528	3.353
		0.6401	0.932	0.6238	1.1895		0.7412	0.9879	0.7358	0.9581	3.364
		0.6784	0.9835	0.6684	0.9991		0.7751	1.0994	0.7042	0.9727	3.107
		0.7274	0.952	0.7329	0.9767		0.7272	0.9346	0.6967	0.9317	3.338
		0.6794	1.0638	0.7212	0.9825		0.767	0.9635	0.8137	0.9964	3.353
second experiment		0.6526	0.7911	0.6828	0.718		0.6658	0.8115	0.6995	0.7061	3.106
		0.6364	0.7529	0.6573	0.7323		0.6713	0.7951	0.7763	0.6652	3.189
		0.6402	0.7976	0.658	0.7397		0.6909	0.79	0.71	0.7038	3.347
		0.6152	0.7676	0.7394	0.7183		0.6621	0.7784	0.731	0.7025	3.263
		0.7224	0.758	0.6343	0.7134		0.6707	0.7842	0.7381	0.7156	3.364
		0.7368	0.7569	0.6489	0.7232		0.6704	0.7772	0.7171	0.6946	3.107
third experiment		0.6991	0.7476	0.878	0.7589		0.6293	0.845	0.6757	0.6568	3.24
		0.6554	0.8179	0.8432	0.6983		0.5836	0.7574	0.7028	0.6472	3.37
		0.6275	0.8152	0.7971	0.6985		0.5952	0.8425	0.6953	0.6505	3.338
		0.673	0.8467	0.8381	0.7727		0.594	0.7798	0.665	0.6045	3.353
		0.6788	0.8011	0.8332	0.7834		0.6378	0.8174	0.7169	0.6623	3.365
		0.6572	0.7496	0.5072	0.7212		0.6381	0.7714	0.6736	0.6422	3.19
fourth experiment		0.3805	0.5472	0.3705	0.4207		0.3656	0.4994	0.4217	0.4011	1.0363
		0.365	0.5472	0.3814	0.3997		0.3334	0.4753	0.3772	0.4667	1.0717
		0.3773	0.4746	0.3471	0.3673		0.3519	0.4596	0.3851	0.4013	1.1059
		0.3588	0.657	0.3511	0.3929		0.3688	0.4529	0.3707	0.4077	1.1003
		0.3674	0.5645	0.3419	0.3988		0.3431	0.4805	0.3838	0.4042	1.0506
		0.364	0.5748	0.3402	0.3877		0.3738	0.4823	0.3828	0.4014	1.0877
