# Supplementary material for: Sevoflurane Aggravates the Progress of Alzheimer’s Disease Through NLRP3/Caspase-1/Gasdermin D Pathway
Source: Frontiers journal article supplement (doi:10.3389/fcell.2021.801422), 2022-01-19
Supplement: Data_Sheet_2.ZIP [file Data_Sheet_2.ZIP]

## Sheet: Sheet1
First experiment data								second experiment data								third experiment data
Sample Name	Target Name	Cт	Cт Mean	δCt	δδCt	2^(-δδCt)		Sample Name	Target Name	Cт	Cт Mean	δCt	δδCt	2^(-δδCt)		Sample Name	Target Name	Cт	Cт Mean	δCt	δδCt	2^(-δδCt)
con	gapdh	18.5059	18.1501					con	gapdh	17.7606	17.6118					con	gapdh	18.573	18.4873
con	gapdh	17.7944	18.1501					con	gapdh	17.5788	17.6118					con	gapdh	18.3417	18.4873
con	gapdh	17.543	17.594					con	gapdh	17.4962	17.6118					con	gapdh	18.5472	18.4873
lps	gapdh	17.9202	17.7961					lps	gapdh	17.5859	17.6136					lps	gapdh	18.0646	17.987
lps	gapdh	17.6721	17.7961					lps	gapdh	17.7282	17.6136					lps	gapdh	17.9706	17.987
lps	gapdh	17.679	17.7961					lps	gapdh	17.5267	17.6136					lps	gapdh	17.9257	17.987
lps+sevo	gapdh	17.9545	17.9143					lps+sevo	gapdh	17.5393	17.5409					lps+sevo	gapdh	18.0217	18.0643
lps+sevo	gapdh	17.8742	17.9143					lps+sevo	gapdh	17.5296	17.5409					lps+sevo	gapdh	18.0507	18.0643
lps+sevo	gapdh	17.9348	17.9143					lps+sevo	gapdh	17.5539	17.5409					lps+sevo	gapdh	18.1204	18.0643
lps+vx765	gapdh	17.4891	17.4985					lps+vx765	gapdh	17.6289	17.6515					lps+vx765	gapdh	17.7639	17.594
lps+vx766	gapdh	17.532	17.4985					lps+vx766	gapdh	17.6467	17.6515					lps+vx766	gapdh	17.4751	17.594
lps+vx767	gapdh	17.4744	17.4985					lps+vx767	gapdh	17.679	17.6515					lps+vx767	gapdh	17.543	17.594
lps+vx765+sevo	gapdh	17.5516	17.5289					lps+vx765+sevo	gapdh	17.4232	17.5281					lps+vx765+sevo	gapdh	17.919	17.9251
lps+vx766+sevo	gapdh	17.5053	17.5289					lps+vx766+sevo	gapdh	17.5114	17.5281					lps+vx766+sevo	gapdh	17.9348	17.9251
lps+vx767+sevo	gapdh	17.5296	17.5289					lps+vx767+sevo	gapdh	17.6498	17.5281					lps+vx767+sevo	gapdh	17.9217	17.9251
con	TNF-a	25.277	25.3696	7.12683	-0.328578	1.25577		con	TNF-a	25.6282	25.4603	8.01631	0.167889	0.890144		con	TNF-a	26.2074	26.058	7.72009	0.149343	0.901661
con	TNF-a	25.4622	25.3696	7.31203	-0.143376	1.10449		con	TNF-a	25.3221	25.4603	7.71021	-0.13821	1.10054		con	TNF-a	25.9142	26.058	7.42692	-0.143827	1.10483
con	TNF-a	25.5214	25.3696	7.92736	0.471953	0.720988		con	TNF-a	25.4306	25.4603	7.81874	-0.0296796	1.02079		con	TNF-a	26.0525	26.058	7.56523	-0.00551605	1.00383
lps	TNF-a	21.8274	21.7895	4.03126	-3.42415	10.7343		lps	TNF-a	21.9143	21.8946	4.30072	-3.5477	11.694		lps	TNF-a	21.9778	24.6524	3.99081	-3.57994	11.9583
lps	TNF-a	21.7516	21.7895	3.95544	-3.49997	11.3135		lps	TNF-a	21.961	21.8946	4.3474	-3.50102	11.3217		lps	TNF-a	21.9376	24.6524	3.95064	-3.62011	12.2959
lps	TNF-a	21.6891	21.7895	3.893	-3.56241	11.8139		lps	TNF-a	21.8085	21.8946	4.19493	-3.65349	12.5837		lps	TNF-a	21.9418	24.6524	3.95478	-3.61596	12.2607
lps+sevo	TNF-a	20.2996	20.5296	2.38526	-5.07015	33.5944		lps+sevo	TNF-a	20.4285	20.3965	2.88756	-4.96086	31.1436		lps+sevo	TNF-a	21.9634	22.0494	3.8991	-3.67165	12.7431
lps+sevo	TNF-a	20.7595	20.5296	2.84523	-4.61018	24.4231		lps+sevo	TNF-a	20.461	20.3965	2.92003	-4.92839	30.4503		lps+sevo	TNF-a	20.0664	22.0494	2.00217	-5.56857	47.4578
lps+sevo	TNF-a	20.6925	20.5296	2.77813	-4.67727	25.5858		lps+sevo	TNF-a	20.3	20.3965	2.75908	-5.08934	34.0442		lps+sevo	TNF-a	21.1185	22.0494	3.05422	-4.51652	22.8881
lps+vx765	TNF-a	21.9147	21.9388	4.41617	-3.03923	8.22055		lps+vx765	TNF-a	22.4939	21.9539	4.84238	-3.00605	8.03359		lps+vx765	TNF-a	22.0846	21.9636	4.49061	-3.08013	8.45693
lps+vx766	TNF-a	21.9809	21.9388	4.48242	-2.97298	7.85159		lps+vx766	TNF-a	22.5599	21.9539	4.90838	-2.94004	7.67431		lps+vx766	TNF-a	22.0771	21.9636	4.48314	-3.08761	8.50085
lps+vx767	TNF-a	21.9209	21.9388	4.42238	-3.03303	8.18526		lps+vx767	TNF-a	22.3679	21.9539	4.7164	-3.13202	8.7666		lps+vx767	TNF-a	21.929	21.9636	4.33501	-3.23574	9.42006
lps+vx765+sevo	TNF-a	20.174	20.4575	2.64516	-4.81024	28.0561		lps+vx765+sevo	TNF-a	20.6292	20.5865	3.10103	-4.74739	26.86		lps+vx765+sevo	TNF-a	20.974	20.5057	3.04888	-4.52187	22.973
lps+vx766+sevo	TNF-a	20.614	20.4575	3.0852	-4.37021	20.6806		lps+vx766+sevo	TNF-a	20.5576	20.5865	3.02947	-4.81895	28.2259		lps+vx766+sevo	TNF-a	20.8726	20.5057	2.94741	-4.62333	24.6469
lps+vx767+sevo	TNF-a	20.5846	20.4575	3.0557	-4.39971	21.1078		lps+vx767+sevo	TNF-a	20.5728	20.5865	3.04473	-4.80369	27.929		lps+vx767+sevo	TNF-a	20.7704	20.5057	2.84523	-4.72552	26.4559
con	IL-1β	28.6998	28.6638	10.5497	-0.13364	1.09706		con	IL-1β	28.7424	28.8288	11.1305	-0.0864665	1.06177		con	IL-1β	28.7768	28.869	10.2895	-0.0922464	1.06603
con	IL-1β	28.6279	28.6638	10.4777	-0.2056	1.15317		con	IL-1β	28.7986	28.8288	11.1867	-0.0302722	1.0212		con	IL-1β	28.88	28.869	10.3927	0.0110099	0.992398
con	IL-1β	28.6166	28.6638	11.0226	0.339239	0.790458		con	IL-1β	28.9456	28.8288	11.3337	0.116739	0.92227		con	IL-1β	28.9503	28.869	10.463	0.0812365	0.945247
lps	IL-1β	22.7706	22.7469	4.97449	-5.70883	52.3031		lps	IL-1β	23.0559	23.0553	5.44227	-5.77472	54.7473		lps	IL-1β	23.2003	23.3815	5.21337	-5.16836	35.961
lps	IL-1β	22.7231	22.7469	4.92696	-5.75635	54.0547		lps	IL-1β	23.0287	23.0553	5.41511	-5.80188	55.7881		lps	IL-1β	23.651	23.3815	5.66401	-4.71772	26.3132
lps	IL-1β	22.7911	22.7469	4.99493	-5.68839	51.5673		lps	IL-1β	23.0815	23.0553	5.46787	-5.74912	53.7847		lps	IL-1β	23.2932	23.3815	5.30626	-5.07547	33.7186
lps+sevo	IL-1β	21.7051	21.8017	3.79075	-6.89256	118.814		lps+sevo	IL-1β	22.0168	21.9622	4.47586	-6.74113	106.975		lps+sevo	IL-1β	22.1795	22.2533	4.11523	-6.2665	76.9845
lps+sevo	IL-1β	21.8983	21.8017	3.98396	-6.69935	103.922		lps+sevo	IL-1β	21.9698	21.9622	4.42892	-6.78807	110.513		lps+sevo	IL-1β	22.1307	22.2533	4.0664	-6.31533	79.6349
lps+sevo	IL-1β	21.9013	21.8017	3.98702	-6.69629	103.701		lps+sevo	IL-1β	21.9001	21.9622	4.35918	-6.85781	115.986		lps+sevo	IL-1β	22.1497	22.2533	4.08543	-6.2963	78.5913
lps+vx765	IL-1β	23.4236	23.2989	5.92507	-4.75824	27.0628		lps+vx765	IL-1β	23.3582	23.3031	5.70669	-5.5103	45.5792		lps+vx765	IL-1β	23.3634	23.3983	5.76941	-4.61232	24.4594
lps+vx766	IL-1β	23.3184	23.2989	5.81993	-4.86338	29.1087		lps+vx766	IL-1β	23.2547	23.3031	5.6032	-5.61379	48.9688		lps+vx766	IL-1β	23.3948	23.3983	5.80082	-4.58091	23.9327
lps+vx767	IL-1β	23.1547	23.2989	5.65623	-5.02708	32.6063		lps+vx767	IL-1β	23.2964	23.3031	5.64485	-5.57214	47.5754		lps+vx767	IL-1β	23.4367	23.3983	5.84266	-4.53907	23.2486
lps+vx765+sevo	IL-1β	22.4813	22.508	4.95242	-5.7309	53.1094		lps+vx765+sevo	IL-1β	22.6694	22.5699	5.14125	-6.07574	67.4498		lps+vx765+sevo	IL-1β	22.6245	22.5867	4.69936	-5.68237	51.3528
lps+vx766+sevo	IL-1β	22.5227	22.508	4.99387	-5.68944	51.6052		lps+vx766+sevo	IL-1β	22.544	22.5699	5.01589	-6.2011	73.573		lps+vx766+sevo	IL-1β	22.6226	22.5867	4.69743	-5.6843	51.4216
lps+vx767+sevo	IL-1β	22.52	22.508	4.99114	-5.69217	51.7028		lps+vx767+sevo	IL-1β	22.4962	22.5699	4.96812	-6.24887	76.0496		lps+vx767+sevo	IL-1β	22.5129	22.5867	4.58779	-5.79394	55.4818
con	IL-6	30.3108	30.4076	12.1606	-0.283969	1.21754		con	IL-6	29.9061	29.9832	12.2943	-0.0770524	1.05486		con	IL-6	30.2679	30.3314	11.7806	-0.0634549	1.04497
con	IL-6	30.5045	30.4076	12.3543	-0.0903022	1.06459		con	IL-6	30.0907	29.9832	12.4789	0.107541	0.928169		con	IL-6	30.2568	30.3314	11.7695	-0.0745347	1.05302
con	IL-6	30.4129	30.4076	12.8189	0.374271	0.771495		con	IL-6	29.9527	29.9832	12.3409	-0.0304883	1.02136		con	IL-6	30.4694	30.3314	11.9821	0.13799	0.908785
lps	IL-6	22.5178	22.4503	4.72168	-7.72293	211.268		lps	IL-6	22.0647	22.2137	4.45107	-7.92029	242.239		lps	IL-6	22.3888	22.3595	4.40184	-7.44224	173.915
lps	IL-6	22.3828	22.4503	4.58664	-7.85797	231.998		lps	IL-6	22.3571	22.2137	4.74351	-7.62785	197.793		lps	IL-6	22.3301	22.3595	4.34314	-7.50093	181.137
lps	IL-6	22.4211	22.4503	4.62496	-7.81965	225.918		lps	IL-6	22.2193	22.2137	4.60575	-7.7656	217.61		lps	IL-6	22.3596	22.3595	4.37264	-7.47143	177.47
lps+sevo	IL-6	21.3076	21.4284	3.39325	-9.05136	530.555		lps+sevo	IL-6	21.3718	21.3748	3.83084	-8.54051	372.349		lps+sevo	IL-6	21.2005	21.2251	3.13628	-8.70779	418.125
lps+sevo	IL-6	21.5492	21.4284	3.63492	-8.80969	448.726		lps+sevo	IL-6	21.7316	21.3748	4.19072	-8.18063	290.146		lps+sevo	IL-6	21.2034	21.2251	3.13915	-8.70493	417.296
lps+sevo	IL-6	21.4981	21.4284	3.58377	-8.86084	464.919		lps+sevo	IL-6	21.0211	21.3748	3.48019	-8.89116	474.796		lps+sevo	IL-6	21.2713	21.2251	3.207	-8.63707	398.123
lps+vx765	IL-6	22.8495	22.8773	5.35097	-7.09364	136.583		lps+vx765	IL-6	22.9045	22.8699	5.25296	-7.1184	138.948		lps+vx765	IL-6	22.9655	22.9474	5.37146	-6.47261	88.8076
lps+vx766	IL-6	22.8314	22.8773	5.33293	-7.11168	138.303		lps+vx766	IL-6	22.8251	22.8699	5.17353	-7.19783	146.812		lps+vx766	IL-6	22.9549	22.9474	5.3609	-6.48318	89.4605
lps+vx767	IL-6	22.9512	22.8773	5.45269	-6.99192	127.285		lps+vx767	IL-6	22.8802	22.8699	5.22862	-7.14273	141.311		lps+vx767	IL-6	22.9219	22.9474	5.32794	-6.51614	91.5279
lps+vx765+sevo	IL-6	21.7972	21.7538	4.26833	-8.17628	289.272		lps+vx765+sevo	IL-6	21.8516	21.7906	4.32346	-8.0479	264.642		lps+vx765+sevo	IL-6	21.7748	21.7461	3.84966	-7.99441	255.01
lps+vx766+sevo	IL-6	21.7083	21.7538	4.17942	-8.26519	307.659		lps+vx766+sevo	IL-6	21.7959	21.7906	4.26777	-8.10359	275.057		lps+vx766+sevo	IL-6	21.7392	21.7461	3.81401	-8.03006	261.39
lps+vx767+sevo	IL-6	21.756	21.7538	4.22712	-8.21749	297.653		lps+vx767+sevo	IL-6	21.7243	21.7906	4.19615	-8.17521	289.057		lps+vx767+sevo	IL-6	21.7244	21.7461	3.79921	-8.04486	264.086
First experiment data analysis								Second experiment data analysis								Third experiment data analysis
Gene	con	lps	lps+sevo	lps+vx765	lps+vx765+sevo			Gene	con	lps	lps+sevo	lps+vx765	lps+vx765+sevo			Gene	con	lps	lps+sevo	lps+vx765	lps+vx765+sevo
TNF-a	1.25577	10.7343	33.5944	8.22055	28.0561			TNF-a	0.890144	11.694	31.1436	8.03359	26.86			TNF-a	0.901661	11.9583	12.7431	8.45693	22.973
	1.10449	11.3135	24.4231	7.85159	20.6806				1.10054	11.3217	30.4503	7.67431	28.2259				1.10483	12.2959	47.4578	8.50085	24.6469
	0.720988	11.8139	25.5858	8.18526	21.1078				1.02079	12.5837	34.0442	8.7666	27.929				1.00383	12.2607	22.8881	9.42006	26.4559
average data	1.02708	11.2872	27.8678	8.0858	23.2815			average data	1.00382	11.8665	31.8794	8.15817	27.6716			average data	1.00344	12.1716	27.6963	8.79261	24.6919
IL-1β	1.09706	52.3031	118.814	27.0628	53.1094			IL-1β	1.06177	54.7473	106.975	45.5792	67.4498			IL-1β	1.06603	35.961	76.9845	24.4594	51.3528
	1.15317	54.0547	103.922	29.1087	51.6052				1.0212	55.7881	110.513	48.9688	73.573				0.992398	26.3132	79.6349	23.9327	51.4216
	0.790458	51.5673	103.701	32.6063	51.7028				0.92227	53.7847	115.986	47.5754	76.0496				0.945247	33.7186	78.5913	23.2486	55.4818
average data	1.01356	52.6417	108.812	29.5926	52.1391			average data	1.00175	54.7733	111.158	47.3745	72.3575			average data	1.00122	31.9976	78.4036	23.8802	52.7521
IL-6	1.21754	211.268	530.555	136.583	289.272			IL-6	1.05486	242.239	372.349	138.948	264.642			IL-6	1.04497	173.915	418.125	88.8076	255.01
	1.06459	231.998	448.726	138.303	307.659				0.928169	197.793	290.146	146.812	275.057				1.05302	181.137	417.296	89.4605	261.39
	0.771495	225.918	464.919	127.285	297.653				1.02136	217.61	474.796	141.311	289.057				0.908785	177.47	398.123	91.5279	264.086
average data	1.01788	223.061	481.4	134.057	298.195			average data	1.00146	219.214	379.097	142.357	276.252			average data	1.00226	177.507	411.182	89.932	260.162
